# Supplementary material for: Chapter 4: Protein Interactions and Disease
Source: PLoS Comput Biol. 2012 Dec 27;8(12):e1002819. doi: 10.1371/journal.pcbi.1002819 (PMC3531279; doi:10.1371/journal.pcbi.1002819)
Supplement: Dataset S2 — EBV-Human Interactome Data. (SIF) [file pcbi.1002819.s003.sif]

BALF2	interacts	ELF2
BALF2	interacts	FBLN5
BALF4	interacts	GRN
BALF4	interacts	LTBP4
BALF4	interacts	LZTS2
BALF4	interacts	AP2B1
BALF4	interacts	FN1
BALF4	interacts	LAMB1
BALF4	interacts	PDE6G
BALF4	interacts	TRAF2
BALF4	interacts	VIM
BALF4	interacts	VWF
BALF4	interacts	GPRASP1
BALF4	interacts	FBLN5
BALF4	interacts	UBXD5
BALF4	interacts	LOC130074
BaRF1	interacts	SERTAD1
BaRF1	interacts	ACTN1
BaRF1	interacts	PKM2
BaRF1	interacts	TMEM66
BBRF2	interacts	PRKCABP
BBRF2	interacts	ARHGEF10L
BBRF3	interacts	NUCB1
BBRF3	interacts	HOMER3
BDLF1	interacts	CCDC14
BDLF1	interacts	CTSC
BDLF1	interacts	MAPK7
BDLF2	interacts	LTBP4
BDLF2	interacts	TES
BDLF2	interacts	APOL3
BDLF2	interacts	PSME3
BDLF2	interacts	PSMA3
BDLF3	interacts	HOMER3
BDLF3.5	interacts	SERTAD1
BDLF4	interacts	MFSD1
BDLF4	interacts	PIGS
BFLF2	interacts	GRN
BFLF2	interacts	LTBP4
BFLF2	interacts	FBLN5
BFLF2	interacts	CASKIN2
BFLF2	interacts	BAT3
BFLF2	interacts	EFEMP1
BFLF2	interacts	NUCB1
BFLF2	interacts	MARCO
BFLF2	interacts	EFEMP2
BFLF2	interacts	TRAF3IP3
BFLF2	interacts	ACTN1
BFLF2	interacts	FBLN2
BFLF2	interacts	LAMB2
BFLF2	interacts	PLSCR1
BFLF2	interacts	UBE2I
BFLF2	interacts	HOMER3
BFLF2	interacts	RBPMS
BFLF2	interacts	DKK3
BFLF2	interacts	TXNDC11
BFLF2	interacts	EGFL7
BFLF2	interacts	TSNARE1
BFRF1	interacts	GRN
BFRF1	interacts	VWF
BFRF1	interacts	HRMT1L2
BFRF1	interacts	SLIT3
BFRF1	interacts	HOMER3
BGLF2	interacts	C20orf18
BGLF2	interacts	TUBA3
BGLF2	interacts	HOMER3
BGLF2	interacts	OPTN
BGLF2	interacts	SHRM
BGLF4	interacts	LOC440369
BGLF4	interacts	IQGAP2
BHRF1	interacts	GRN
BHRF1	interacts	LTBP4
BHRF1	interacts	ACTN1
BHRF1	interacts	FN1
BHRF1	interacts	TNXB
BHRF1	interacts	TRAF1
BHRF1	interacts	VWF
BILF1	interacts	HOMER3
BILF1	interacts	GRN
BILF1	interacts	LMNB1
BILF1	interacts	VWF
BILF1	interacts	SLIT2
BKRF2	interacts	HOMER3
BLLF1	interacts	HOMER3
BLLF2	interacts	GRN
BLRF1	interacts	HOMER3
BNLF2b	interacts	GRN
BOLF1	interacts	PSMA3
BOLF1	interacts	SERTAD1
BPLF1	interacts	CCHCR1
BPLF1	interacts	CD74
BPLF1	interacts	CLK1
BPLF1	interacts	GAPDH
BPLF1	interacts	GRN
BPLF1	interacts	HBB
BPLF1	interacts	HLA-A
BPLF1	interacts	HLA-B
BPLF1	interacts	IGLL1
BPLF1	interacts	RPL3
BPLF1	interacts	CIR
BPLF1	interacts	LASS4
BPLF1	interacts	NUCB2
BRRF1	interacts	PARP4
BRRF1	interacts	PLSCR1
BRRF1	interacts	EFEMP1
BRRF1	interacts	SEPP1
BRRF1	interacts	TRAF2
BRRF1	interacts	SNX4
BRRF1	interacts	FBLN5
BRRF1	interacts	SH3GLB1
BRRF1	interacts	NTN4
BRRF1	interacts	LZTS2
BRRF1	interacts	PHYHD1
BSLF1	interacts	NFKB1
BTRF1	interacts	PPP1CA
BVRF1	interacts	EFEMP1
BVRF1	interacts	NCKIPSD
BVRF1	interacts	ACTN1
BVRF1	interacts	PKM2
BVRF1	interacts	PSMA3
BVRF1	interacts	TSG101
BVRF1	interacts	PSME3
BVRF1	interacts	IMMT
BVRF1	interacts	EFEMP2
BVRF1	interacts	RNF31
BVRF1	interacts	MMRN2
BXLF1	interacts	TSC22D4
BXLF1	interacts	GPRASP1
BXLF1	interacts	COVA1
BXLF1	interacts	GPRASP2
BXRF1	interacts	FBLN5
BZLF1	interacts	GPRASP1
BZLF1	interacts	COVA1
BZLF2	interacts	GRN
EBNA1	interacts	C1QBP
EBNA1	interacts	MDFI
EBNA1	interacts	KPNA2
EBNA1	interacts	PRKCABP
EBNA1	interacts	TSG101
EBNA2-t1	interacts	PSMA3
EBNA2-t1	interacts	AES
EBNA2-t1	interacts	CD5L
EBNA2-t1	interacts	MCP
EBNA2-t1	interacts	RBP1
EBNA2-t1	interacts	SRI
EBNA2-t1	interacts	ZMYND11
EBNA2-t1	interacts	BLNK
EBNA2-t1	interacts	FCHSD1
EBNA2-t2	interacts	FBLN5
EBNA2-t2	interacts	CBX3
EBNA2-t2	interacts	EFEMP2
EBNA2-t2	interacts	DNCL1
EBNA2-t2	interacts	KRTHA6
EBNA2-t2	interacts	GCA
EBNA2-t2	interacts	SH3GLB1
EBNA2-t2	interacts	RCBTB1
EBNA3A	interacts	NR4A1
EBNA3A	interacts	RPL4
EBNA3B	interacts	ZYX
EBNA3B	interacts	PSMA3
EBNA3B	interacts	SH3GLB1
EBNA3B	interacts	ACTN4
EBNA3B	interacts	ACTN1
EBNA3C	interacts	FBLN5
EBNA3C	interacts	PSMA3
EBNA3C	interacts	SEPP1
EBNA3C	interacts	VWF
EBNA-LP	interacts	PSMA3
LMP1	interacts	EGFL7
LMP2A	interacts	LGALS3BP
SM	interacts	MAPRE1
SM	interacts	SFRS10
SM	interacts	SP100
SM	interacts	FLJ40113
