# Supplementary material for: Chapter 4: Protein Interactions and Disease
Source: PubMed Central journal article supplement (PMC3531279; doi:10.1371/journal.pcbi.1002819), 2012-12-27

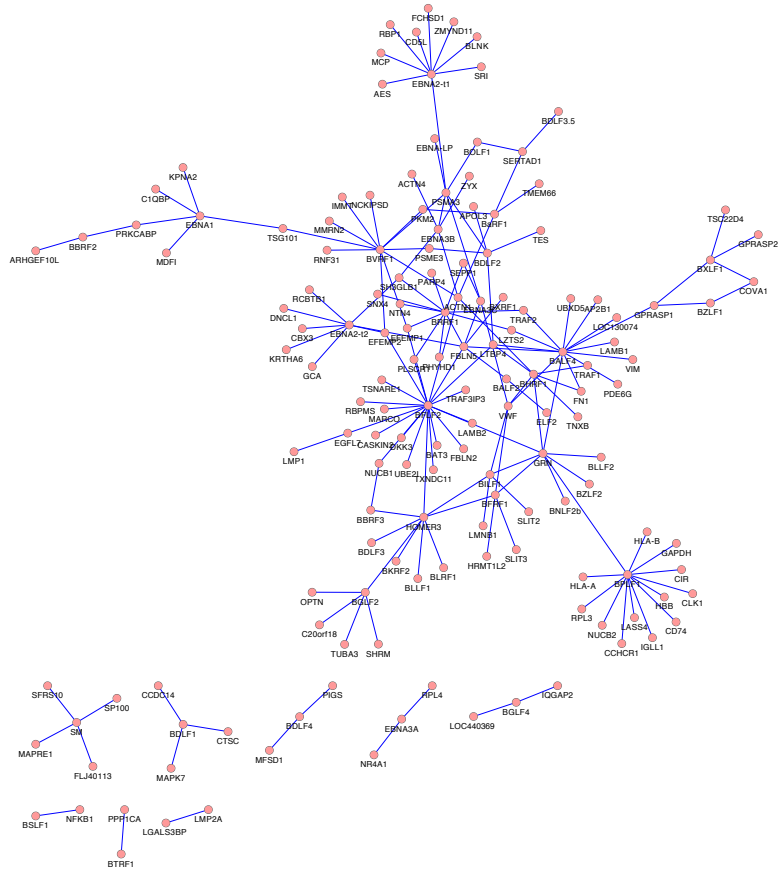

Supplement: pcbi.1002819.s005.pdf [file pcbi.1002819.s005.pdf]
